# Supplementary material for: An Efficient Modular Gateway Recombinase-Based Gene Stacking System for Generating Multi-Trait Transgenic Plants
Source: Plants (Basel). 2022 Feb 11;11(4):488. doi: 10.3390/plants11040488 (PMC8879548; doi:10.3390/plants11040488)
Supplement: Supplementary file 1 [file plants-11-00488-s001.zip]

Archive with 5 entries (5 files):
- Supplementary data S1.zip
- Supplementary data S2.zip
- Supplementary file S1.pdf
- Supplementary Table S1.xlsx
- Supplementary Table S2 .xlsx
