# Supplementary material for: An Efficient Modular Gateway Recombinase-Based Gene Stacking System for Generating Multi-Trait Transgenic Plants
Source: Plants (Basel). 2022 Feb 11;11(4):488. doi: 10.3390/plants11040488 (PMC8879548; doi:10.3390/plants11040488)
Supplement: Supplementary file 1 [file plants-11-00488-s001.zip › Supplementary Table S1.xlsx]

## Sheet: Sheet1
ID	Name	Category	Components	Backbone resistance	Additional resistance	Description
1	pGN2101CAK	Donor	L1=Kan+ccdB=R3-SacB+AmpR-R4-L2	Chl	Amp and Kan	Bsaic usage
2	pGN2102CGK	Donor	L3=Kan+ccdB=R1-SacB+GenR-R2-L4	Chl	Gen and Kan	Bsaic usage
3	pGN2103CAK	Donor	P1-Kan+ccdB-P3r-SacB+AmpR-R4-L2	Chl	Amp and Kan	Bsaic usage
4	pGN2104CGK	Donor	P3-Kan+ccdB-P1r-SacB+GenR-R2-L4	Chl	Gen and Kan	Bsaic usage
5	pGN2105CK	Donor	L1=Kan+ccdB=L2	Chl	Kan	Bsaic usage
6	pGN2106CK	Donor	L3=Kan+ccdB=L4	Chl	Kan	Bsaic usage
7	pGN2109CK	Donor	L1=Kan+ccdB=R5	Chl	Kan	Multi-fragement stacking
8	pGN2110CK	Donor	L5=Kan+ccdB=L2	Chl	Kan	Multi-fragement stacking
9	pGN2111CK	Donor	L1=Kan+ccdB=L4	Chl	Kan	Multi-fragement stacking
10	pGN2112CK	Donor	R4=Kan+ccdB=R3	Chl	Kan	Multi-fragement stacking
11	pGN2113CK	Donor	L3=Kan+ccdB=L2	Chl	Kan	Multi-fragement stacking
12	pGN2114CK	Donor	L5=Kan+ccdB=L4	Chl	Kan	Multi-fragement stacking
13	pGN2115CK	Donor	L1=Kan+ccdB=R6	Chl	Kan	Multi-fragement stacking
14	pGN2116CK	Donor	L3=Kan+ccdB=R5	Chl	Kan	Multi-fragement stacking
15	pGN2117CK	Donor	L3=Kan+ccdB=R6	Chl	Kan	Multi-fragement stacking
16	pGN2118CK	Donor	L6=Kan+ccdB=R5	Chl	Kan	Multi-fragement stacking
17	pGN2119CAK	Donor	L5=Kan+ccdB=R3-SacB+AmpR-R4-L2	Chl	Amp and Kan	Multi-fragement stacking
18	pGN2120CGK	Donor	L5=Kan+ccdB=R1-SacB+GenR-R2-L4	Chl	Gen and Kan	Multi-fragement stacking
19	pGN2121CK	Donor	P1-Kan+ccdB-P4	Chl	Kan	Multi-fragement stacking
20	pGN2122CK	Donor	P1-Kan+ccdB-P5r	Chl	Kan	Multi-fragement stacking
21	pGN2123CK	Donor	P4r-Kan+ccdB-P3r	Chl	Kan	Multi-fragement stacking
22	pGN2124CK	Donor	P5-Kan+ccdB-P2	Chl	Kan	Multi-fragement stacking
23	pGN2125CK	Donor	P5-Kan+ccdB-P4	Chl	Kan	Multi-fragement stacking
24	pGN2126CK	Donor	P3-Kan+ccdB-P2	Chl	Kan	Multi-fragement stacking
25	pGN2127CK	Donor	P1-Kan+ccdB-P6r	Chl	Kan	Multi-fragement stacking
26	pGN2128CK	Donor	P3-Kan+ccdB-P5r	Chl	Kan	Multi-fragement stacking
27	pGN2129CK	Donor	P3-Kan+ccdB-P6r	Chl	Kan	Multi-fragement stacking
28	pGN2130CK	Donor	P6-Kan+ccdB-P5r	Chl	Kan	Multi-fragement stacking
29	pGN2131CAK	Donor	P5-Kan+ccdB-P3r-SacB+AmpR-R4-L2	Chl	Amp and Kan	Multi-fragement stacking
30	pGN2132CGK	Donor	P5-Kan+ccdB-P1r-SacB+GenR-R2-L4	Chl	Gen and Kan	Multi-fragement stacking
31	pGN2133CK	Donor	L1=Kan+ccdB-(I-CeuI)=L2	Chl	Kan	Repeat elimination
32	pGN2134CK	Donor	L3=Kan+ccdB-(I-CeuI)=L4	Chl	Kan	Repeat elimination
33	pGN2135CK	Donor	L1=Kan+ccdB-(loxP)-(I-CeuI)=L2	Chl	Kan	Repeat elimination
34	pGN2136CK	Donor	L3=Kan+ccdB-(loxP)-(I-CeuI)=L4	Chl	Kan	Repeat elimination
35	pGN3101GC	Donor	P1-Chl+ccdB-P2	Gen	Chl	Endentry obtainment via BP reaction
36	pGN3102GC	Donor	P3-Chl+ccdB-P4	Gen	Chl	Endentry obtainment via BP reaction
37	pGN2201KC	Destination	LB-MCS=R1-Chl+ccdB-R2=RB	Kan	Chl	pCambia backbone
38	pGN2202KC	Destination	LB-MCS==R1-Chl+ccdB-R2-RB	Kan	Chl	pCambia backbone
39	pGN2203K	Destination	LB-MCS=R1-SacB-R2=RB(BsmBI）	Kan		pCambia backbone
40	pGN2204KC	Destination	LB-loxP511-R1-Chl+ccdB-R2==loxP-T35S:HygR:Pe35S-TNOS:Cre:PV4-loxP-loxP511r-RB	Kan	Chl	pCambia backbone, marker-ftee and single copy insertion preference
41	pGN2211KC	Destination	REPP1-REPP1 lytic-LB-R1-Chl+ccdB-R2-(I-CeuI)-RB	Kan	Chl	TAC backbone, repeat elimination
42	pGN2212KC	Destination	REPP1-REPP1 lytic-LB-R1-Chl+ccdB-R2-(loxP)-RB	Kan	Chl	TAC backbone, repeat elimination
43	pGN2301G	Element module	PCmYLCV	Gen		Promoter
44	pGN2302G	Element module	Pe35S	Gen		Promoter
45	pGN2307G	Element module	POsAct1	Gen		Promoter
46	pGN2312G	Element module	PZmUbi	Gen		Promoter
47	pGN2431S	Element module	Bar	Spe		CDS
48	pGN2432S	Element module	HygR	Spe		CDS
49	pGN2433S	Element module	NPTII	Spe		CDS
50	pGN2441S	Element module	GFP	Spe		CDS
51	pGN2442S	Element module	mCherry	Spe		CDS
52	pGN2501G	Element module	T35S	Gen		Terminator
53	pGN2502A	Element module	T3A	Amp		Terminator
54	pGN2503A	Element module	TAg7	Amp		Terminator
55	pGN2504A	Element module	TE9	Amp		Terminator
56	pGN2505A	Element module	THSP	Amp		Terminator
57	pGN2506A	Element module	TNOS	Amp		Terminator
58	pGN2507A	Element module	TOCS	Amp		Terminator
59	pGN2601G	Element module	Pe35S:Bar:T35S	Gen		Expression cassette
60	pGN2602G	Element module	Pe35S:HygR:T35S	Gen		Expression cassette
61	pGN2603G	Element module	Pe35S:NPTII:T35S	Gen		Expression cassette
62	pGN2604G	Element module	loxP-Pe35S:Bar:T35S-PV4:Cre:TNOS-loxP	Gen		Expression cassettes
63	pGN2605G	Element module	loxP-Pe35S:HygR:T35S-PV4:Cre:TNOS-loxP	Gen		Expression cassettes
64	pGN2606G	Element module	loxP-Pe35S:NPTII:T35S-PV4:Cre:TNOS-loxP	Gen		Expression cassettes
