# Supplementary material for: An Efficient Modular Gateway Recombinase-Based Gene Stacking System for Generating Multi-Trait Transgenic Plants
Source: Plants (Basel). 2022 Feb 11;11(4):488. doi: 10.3390/plants11040488 (PMC8879548; doi:10.3390/plants11040488)
Supplement: Supplementary file 1 [file plants-11-00488-s001.zip › Supplementary Table S2 .xlsx]

## Sheet: Sheet1
Name	sequence	purpose
PDSi1f	ggctacggtctccaccaTCTTGAAGCTTCTTGTACCTCAAGAG	Construction of pGN2102CG-PDSi
PDSi1r	ggctacggtctccttacCTTCAGAATCTTTGCTTTACTCTGATCAG
PDSi2f	ggctacggtctccttcgTCTTGAAGCTTCTTGTACCTCAAGAG
PDSi2r	ggctacggtctccacagCTTCAGAATCTTTGCTTTACTCTGATCAG
CAT1f	ggctacggtctcGGTAAATTTCTAGTTTTTCTCCTTC
CAT1r	ggctacggtctctCTGTAACTATCATCATCATCATAG
j1GFPf	ATGGCCGACAAGCAGAAGAA	Detection of eGFP EC in GMBPH
j1GFPr	AACTCCAGCAGGACCATGTG
j2RFPf	GGGCGAGGAGGATAACATGG	Detection of mCherry EC in GMBPH
j2RFPr	AGACCGGCAACAGGATTCAA
j3Barf	GCACTTGTTTGTCGGGTCATC	Detection of Bar EC in GMBPH
j3Barr	TTCAGCAGGTGGGTGTAGAG
j4PDSif	GCTGCTTCGTCAGGCTTAGA	Detection of PDSi EC in GMBPH
j4PDSir	AAGAGAAAAGGGTCCTAACCAAG
j5Hygf	TGACCTATTGCATCTCCCGC	Detection ofHygR EC in GMBPH
j5Hygr	CTCCAGTCAATGACCGCTGT
jCAT1f	TCGTGTGTCTATGATGATGATGA	Sanger sequencing for GMBPH
jCAT1r	GGTCCTAACCAAGAAAATGAAGGA
